# Supplementary material for: Low AMY1 Gene Copy Number Is Associated with Increased Body Mass Index in Prepubertal Boys
Source: PubMed Central journal article supplement (PMC4858278; doi:10.1371/journal.pone.0154961), 2016-05-05
Supplement: pone.0154961.s001.pdf [file pone.0154961.s001.pdf]

| ID | age   | sex (1=male; 2=female) | BMI z-score | CN6   | CV% CN6 | CN14  | CV% CN14 | mean (CN6, CN14) | CV% (CN6, CN14) |
|----|-------|------------------------|-------------|-------|---------|-------|----------|------------------|-----------------|
| 1  | 7.06  | 1                      | 0.3         | 6.92  | 1.96    | 5.85  | 10.18    | 6.39             | 11.90           |
| 2  | 7.98  | 1                      | -1.4        | 14.95 | 11.99   | 13.72 | 7.50     | 14.33            | 6.03            |
| 3  | 8.95  | 1                      | 0.1         | 11.42 | 15.84   |       |          |                  |                 |
| 4  | 7.60  | 1                      | -1.0        | 8.72  | 11.04   |       |          |                  |                 |
| 5  | 8.07  | 2                      | -0.4        | 13.56 | 12.68   |       |          |                  |                 |
| 6  | 7.44  | 1                      | 2.2         | 5.21  | 6.35    | 4.54  | 1.21     | 4.87             | 9.72            |
| 7  | 6.13  | 1                      | -0.1        | 6.67  | 15.82   | 5.46  | 2.07     | 6.06             | 14.11           |
| 8  | 6.14  | 1                      | 0.2         | 8.75  | 16.75   | 7.59  | 5.68     | 8.17             | 10.00           |
| 9  | 7.64  | 2                      | -0.3        | 16.78 | 16.62   |       |          |                  |                 |
| 10 | 7.00  | 1                      | 2.3         | 11.00 | 16.29   | 9.08  | 12.58    | 10.04            | 13.53           |
| 11 | 8.87  | 2                      | 0.2         | 10.43 | 11.48   |       |          |                  |                 |
| 12 | 9.65  | 2                      | 0.3         | 11.28 | 14.36   | 10.35 | 9.87     | 10.82            | 6.07            |
| 13 | 6.32  | 2                      | 1.3         | 11.16 | 1.96    | 9.29  | 15.66    | 10.23            | 12.91           |
| 14 | 9.07  | 2                      | 0.0         | 7.96  | 1.08    |       |          |                  |                 |
| 15 | 11.50 | 2                      | 0.8         | 9.08  | 4.76    | 7.76  | 4.11     | 8.42             | 11.14           |
| 16 | 10.75 | 1                      | 1.9         | 5.89  | 7.43    | 5.13  | 4.50     | 5.51             | 9.66            |
| 17 | 7.11  | 1                      | -0.5        | 7.55  | 16.01   |       |          |                  |                 |
| 18 | 7.00  | 2                      | 2.4         | 12.44 | 13.38   | 10.27 | 2.90     | 11.36            | 13.55           |
| 19 | 5.82  | 2                      | 1.4         | 6.02  | 4.40    | 4.98  | 0.22     | 5.50             | 13.49           |
| 20 | 9.20  | 2                      | 1.0         | 5.02  | 2.00    | 4.38  | 9.55     | 4.70             | 9.50            |
| 21 | 6.66  | 2                      | 1.0         | 6.17  | 8.67    | 5.14  | 1.15     | 5.66             | 12.96           |
| 22 | 8.60  | 1                      | 1.0         | 5.38  | 10.50   | 4.88  | 14.49    | 5.13             | 6.95            |
| 23 | 6.57  | 2                      | 1.5         | 5.58  | 16.95   | 4.84  | 5.47     | 5.21             | 10.02           |
| 24 | 8.77  | 1                      | -0.1        | 12.68 | 16.91   |       |          |                  |                 |
| 25 | 8.80  | 1                      | 2.3         | 3.97  | 4.15    | 3.60  | 8.16     | 3.78             | 7.04            |
| 26 | 9.75  | 1                      | -1.1        | 11.85 | 15.33   |       |          |                  |                 |
| 27 | 6.85  | 1                      | 0.3         | 4.66  | 11.80   | 4.07  | 10.66    | 4.37             | 9.61            |
| 28 | 10.18 | 1                      | -0.2        | 11.80 | 10.98   | 10.31 | 11.48    | 11.06            | 9.54            |
| 29 | 7.53  | 2                      | 0.3         | 8.93  | 10.05   |       |          |                  |                 |
| 30 | 8.72  | 2                      | -1.4        | 7.70  | 10.09   | 6.70  | 2.54     | 7.20             | 9.82            |
| 31 | 6.25  | 2                      | 1.6         | 8.18  | 9.44    | 6.59  | 8.72     | 7.39             | 15.20           |
| 32 | 6.94  | 2                      | -0.1        | 5.02  | 0.93    | 4.62  | 3.59     | 4.82             | 5.86            |

|    |       |   |      |       |       |       |       |       |       |
|----|-------|---|------|-------|-------|-------|-------|-------|-------|
| 33 | 9.94  | 2 | 1.5  | 10.36 | 12.28 | 8.14  | 13.92 | 9.25  | 16.96 |
| 34 | 7.99  | 2 | 2.5  | 13.95 | 9.52  | 12.20 | 12.93 | 13.08 | 9.43  |
| 35 | 9.91  | 2 | 0.2  | 5.78  | 7.19  |       |       |       |       |
| 36 | 6.45  | 1 | 0.3  | 10.71 | 2.01  |       |       |       |       |
| 37 | 9.07  | 2 | 0.9  | 9.97  | 4.57  |       |       |       |       |
| 38 | 8.25  | 2 | 1.2  | 8.62  | 7.49  | 6.80  | 13.35 | 7.71  | 16.75 |
| 39 | 7.28  | 2 | -1.0 | 3.24  | 14.34 |       |       |       |       |
| 40 | 10.60 | 1 | -0.5 | 6.98  | 14.57 | 5.77  | 14.23 | 6.38  | 13.49 |
| 41 | 10.09 | 2 | -0.3 | 5.32  | 10.81 |       |       |       |       |
| 42 | 10.19 | 1 | 1.6  | 5.88  | 16.24 |       |       |       |       |
| 43 | 8.04  | 1 | -2.4 | 5.69  | 8.10  |       |       |       |       |
| 44 | 7.65  | 1 | 1.0  | 12.37 | 7.15  | 9.77  | 13.01 | 11.07 | 16.60 |
| 45 | 6.42  | 2 | -0.2 | 7.96  | 15.64 | 6.52  | 2.46  | 7.24  | 14.09 |
| 46 | 10.26 | 1 | 1.1  | 8.07  | 16.06 | 6.77  | 14.04 | 7.42  | 12.40 |
| 47 | 10.35 | 1 | 0.9  | 5.32  | 5.10  | 4.26  | 10.97 | 4.79  | 15.67 |
| 48 | 8.73  | 1 | -0.3 | 8.37  | 4.94  | 7.27  | 8.43  | 7.82  | 9.97  |
| 49 | 7.86  | 1 | 1.5  | 10.85 | 15.45 | 8.71  | 13.48 | 9.78  | 15.46 |
| 50 | 6.90  | 2 | -0.2 | 15.56 | 15.76 | 13.03 | 4.59  | 14.29 | 12.48 |
| 51 | 6.01  | 1 | 0.3  | 6.11  | 13.72 | 5.18  | 7.60  | 5.64  | 11.60 |
| 52 | 6.84  | 1 | 0.1  | 5.31  | 16.92 | 4.49  | 6.19  | 4.90  | 11.82 |
| 53 | 6.87  | 1 | 1.0  | 12.97 | 12.57 |       |       |       |       |
| 54 | 9.06  | 2 | -0.3 | 6.62  | 2.15  |       |       |       |       |
| 55 | 10.42 | 1 | 1.1  | 4.64  | 15.74 |       |       |       |       |
| 56 | 7.08  | 1 | -1.1 | 12.11 | 15.22 |       |       |       |       |
| 57 | 10.05 | 2 | 2.0  | 4.94  | 1.08  |       |       |       |       |
| 58 | 6.52  | 1 | -2.1 | 6.91  | 6.10  |       |       |       |       |
| 59 | 9.20  | 2 | 1.5  | 14.12 | 10.52 |       |       |       |       |
| 60 | 7.79  | 2 | 0.6  | 19.97 | 5.38  |       |       |       |       |
| 61 | 7.66  | 2 | -0.3 | 10.43 | 7.48  | 9.13  | 14.99 | 9.78  | 9.36  |
| 62 | 8.80  | 2 | -2.0 | 5.46  | 6.67  |       |       |       |       |
| 63 | 9.00  | 1 | -0.7 | 7.20  | 11.50 | 6.04  | 0.29  | 6.62  | 12.31 |
| 64 | 9.59  | 2 | 2.3  | 8.75  | 13.15 |       |       |       |       |
| 65 | 8.57  | 2 | 0.1  | 6.86  | 1.28  | 6.00  | 8.84  | 6.43  | 9.52  |

|    |       |   |      |       |       |       |       |       |       |
|----|-------|---|------|-------|-------|-------|-------|-------|-------|
| 66 | 8.60  | 2 | 1.5  | 6.91  | 0.08  | 5.59  | 12.35 | 6.25  | 14.97 |
| 67 | 8.38  | 2 | 0.5  | 5.13  | 1.44  | 4.48  | 8.99  | 4.80  | 9.52  |
| 68 | 10.36 | 1 | 1.8  | 12.87 | 0.45  |       |       |       |       |
| 69 | 7.13  | 2 | 1.8  | 18.30 | 5.39  | 15.27 | 0.59  | 16.79 | 12.77 |
| 70 | 10.11 | 1 | 0.5  | 9.45  | 14.52 |       |       |       |       |
| 71 | 6.41  | 2 | 1.8  | 14.15 | 9.42  | 11.90 | 1.81  | 13.02 | 12.23 |
| 72 | 7.56  | 1 | 2.2  | 8.10  | 3.89  | 6.83  | 7.34  | 7.46  | 12.01 |
| 73 | 8.57  | 1 | 1.7  | 7.07  | 2.81  | 6.17  | 4.75  | 6.62  | 9.63  |
| 74 | 6.90  | 2 | 1.5  | 12.22 | 16.73 |       |       |       |       |
| 75 | 9.06  | 2 | 1.5  | 5.33  | 15.69 |       |       |       |       |
| 76 | 9.06  | 2 | 1.7  | 5.78  | 1.18  | 5.23  | 5.19  | 5.51  | 7.09  |
| 77 | 9.35  | 1 | -1.3 | 7.39  | 3.02  |       |       |       |       |
| 78 | 8.08  | 1 | 1.7  | 14.25 | 4.33  | 12.59 | 3.50  | 13.42 | 8.73  |
| 79 | 6.40  | 2 | 0.7  | 6.64  | 13.93 |       |       |       |       |
| 80 | 8.28  | 2 | 2.2  | 7.89  | 13.21 |       |       |       |       |
| 81 | 7.61  | 2 | 0.7  | 9.08  | 7.16  | 7.64  | 0.13  | 8.36  | 12.13 |
| 82 | 6.85  | 2 | -0.7 | 3.53  | 2.93  | 3.25  | 7.44  | 3.39  | 5.80  |
| 83 | 9.25  | 1 | -0.2 | 10.12 | 13.38 | 8.79  | 5.85  | 9.45  | 9.91  |
| 84 | 7.18  | 2 | -2.0 | 12.30 | 10.00 | 11.16 | 7.57  | 11.73 | 6.87  |
| 85 | 8.25  | 1 | -0.4 | 6.92  | 12.37 | 6.27  | 16.35 | 6.59  | 6.93  |
| 86 | 7.47  | 1 | -0.7 | 8.72  | 13.96 |       |       |       |       |
| 87 | 11.35 | 1 | 0.5  | 7.13  | 16.26 | 5.73  | 13.88 | 6.43  | 15.42 |
| 88 | 6.85  | 1 | 2.0  | 8.24  | 5.00  | 6.94  | 6.23  | 7.59  | 12.06 |
| 89 | 9.45  | 1 | -2.4 | 7.60  | 5.99  | 7.01  | 10.49 | 7.31  | 5.75  |
| 90 | 9.26  | 1 | 1.2  | 15.32 | 1.72  | 13.86 | 5.73  | 14.59 | 7.08  |
| 91 | 6.18  | 2 | 0.2  | 5.73  | 2.21  | 4.94  | 7.92  | 5.33  | 10.40 |
| 92 | 9.54  | 1 | -1.8 | 7.34  | 3.47  |       |       |       |       |
| 93 | 7.35  | 2 | 2.6  | 15.93 | 0.71  |       |       |       |       |
| 94 | 6.91  | 2 | -0.3 | 7.83  | 2.53  |       |       |       |       |
| 95 | 10.59 | 1 | 1.5  | 8.70  | 14.52 |       |       |       |       |
| 96 | 8.26  | 1 | 0.2  | 11.24 | 4.53  | 9.37  | 5.29  | 10.31 | 12.82 |
| 97 | 9.20  | 1 | 2.2  | 4.75  | 4.57  | 3.96  | 5.26  | 4.36  | 12.82 |
| 98 | 5.71  | 2 | -0.1 | 8.32  | 1.44  | 7.45  | 16.08 | 7.89  | 7.77  |

|     |       |   |      |       |       |       |       |       |       |
|-----|-------|---|------|-------|-------|-------|-------|-------|-------|
| 99  | 10.23 | 1 | 0.5  | 6.63  | 16.81 | 5.57  | 6.66  | 6.10  | 12.34 |
| 100 | 8.34  | 1 | -0.6 | 6.72  | 9.62  |       |       |       |       |
| 101 | 8.34  | 1 | 0.6  | 10.56 | 4.44  | 8.71  | 16.67 | 9.63  | 13.60 |
| 102 | 8.50  | 1 | -0.4 | 7.24  | 7.29  | 6.31  | 0.27  | 6.78  | 9.75  |
| 103 | 9.70  | 2 | 2.9  | 12.83 | 2.94  | 11.61 | 6.95  | 12.22 | 7.06  |
| 104 | 7.32  | 2 | 0.1  | 13.94 | 4.29  | 11.81 | 15.47 | 12.88 | 11.69 |
| 105 | 8.42  | 2 | 0.4  | 9.33  | 7.18  | 7.88  | 0.38  | 8.60  | 11.87 |
| 106 | 11.33 | 2 | 1.1  | 6.54  | 13.07 |       |       |       |       |
| 107 | 10.47 | 1 | 0.5  | 10.10 | 14.12 |       |       |       |       |
| 108 | 8.06  | 2 | 1.7  | 8.84  | 14.87 |       |       |       |       |
| 109 | 9.60  | 1 | 0.7  | 7.00  | 4.02  | 6.11  | 3.55  | 6.55  | 9.66  |
| 110 | 10.60 | 2 | -0.7 | 9.36  | 11.52 | 7.78  | 1.72  | 8.57  | 13.06 |
| 111 | 6.97  | 2 | -0.4 | 12.58 | 5.71  | 10.67 | 16.87 | 11.62 | 11.64 |
| 112 | 7.86  | 1 | 1.1  | 6.49  | 14.82 |       |       |       |       |
| 113 | 6.48  | 1 | 0.4  | 6.89  | 7.27  | 5.54  | 7.67  | 6.21  | 15.32 |
| 114 | 7.20  | 2 | 0.3  | 10.28 | 11.08 | 8.63  | 0.14  | 9.46  | 12.30 |
| 115 | 9.99  | 2 | 1.0  | 6.95  | 7.13  | 6.05  | 0.43  | 6.50  | 9.74  |
| 116 | 11.12 | 2 | 1.2  | 5.88  | 16.52 | 4.83  | 10.46 | 5.36  | 13.88 |
| 117 | 7.50  | 1 | 0.6  | 4.51  | 5.86  | 3.95  | 13.39 | 4.23  | 9.40  |
| 118 | 8.00  | 1 | -1.1 | 6.12  | 2.85  | 5.16  | 8.38  | 5.64  | 11.97 |
| 119 | 9.88  | 1 | 2.5  | 6.57  | 16.56 | 5.70  | 5.87  | 6.13  | 9.99  |
| 120 | 7.75  | 1 | 0.7  | 14.15 | 5.55  | 12.78 | 1.53  | 13.47 | 7.18  |
| 121 | 9.13  | 2 | 0.7  | 8.10  | 5.72  | 7.06  | 1.85  | 7.58  | 9.71  |
| 122 | 7.20  | 2 | 1.5  | 7.25  | 15.74 |       |       |       |       |
| 123 | 7.53  | 2 | 1.6  | 5.77  | 12.59 | 4.66  | 5.90  | 5.21  | 15.08 |
| 124 | 7.20  | 2 | 0.3  | 6.04  | 2.96  | 5.38  | 11.45 | 5.71  | 8.15  |
| 125 | 7.42  | 1 | 1.3  | 6.80  | 4.00  |       |       |       |       |
| 126 | 10.33 | 2 | -0.6 | 7.35  | 10.69 | 6.39  | 3.14  | 6.87  | 9.84  |
| 127 | 6.65  | 1 | -0.1 | 5.48  | 1.20  | 4.63  | 10.03 | 5.06  | 11.91 |
| 128 | 6.00  | 1 | -0.9 | 16.56 | 15.11 |       |       |       |       |
| 129 | 10.35 | 2 | 1.6  | 11.21 | 7.67  | 9.44  | 0.65  | 10.32 | 12.15 |
| 130 | 8.17  | 1 | 0.3  | 14.28 | 13.86 |       |       |       |       |
| 131 | 11.31 | 2 | -0.4 | 4.47  | 15.83 |       |       |       |       |

|     |       |   |      |       |       |       |       |       |       |
|-----|-------|---|------|-------|-------|-------|-------|-------|-------|
| 132 | 8.48  | 2 | 0.1  | 11.73 | 7.33  | 10.63 | 11.33 | 11.18 | 7.00  |
| 133 | 7.31  | 2 | 0.5  | 9.55  | 11.87 | 8.34  | 10.59 | 8.95  | 9.62  |
| 134 | 8.76  | 2 | 1.9  | 5.02  | 6.17  | 4.39  | 13.70 | 4.70  | 9.39  |
| 135 | 8.70  | 2 | -0.8 | 8.13  | 13.80 |       |       |       |       |
| 136 | 6.53  | 2 | 0.1  | 9.21  | 4.47  | 7.81  | 15.65 | 8.51  | 11.68 |
| 137 | 9.09  | 2 | 0.8  | 11.96 | 7.17  | 10.80 | 3.15  | 11.38 | 7.20  |
| 138 | 7.38  | 2 | 1.7  | 8.62  | 14.81 |       |       |       |       |
| 139 | 10.47 | 1 | 0.3  | 4.47  | 16.46 |       |       |       |       |
| 140 | 7.42  | 2 | -0.1 | 10.86 | 16.34 |       |       |       |       |
| 141 | 7.54  | 2 | -0.7 | 7.40  | 10.28 | 5.98  | 2.82  | 6.69  | 15.00 |
| 142 | 6.07  | 1 | -0.2 | 11.57 | 10.83 | 9.83  | 4.69  | 10.70 | 11.54 |
| 143 | 6.83  | 1 | 0.6  | 9.32  | 1.37  | 7.87  | 9.86  | 8.60  | 11.91 |
| 144 | 10.19 | 2 | 1.0  | 8.65  | 7.41  | 6.82  | 13.27 | 7.74  | 16.71 |
| 145 | 7.07  | 2 | -1.1 | 4.53  | 3.59  | 3.66  | 9.47  | 4.09  | 14.97 |
| 146 | 8.20  | 1 | -1.4 | 7.52  | 0.72  | 6.35  | 10.50 | 6.93  | 11.89 |
| 147 | 6.75  | 2 | 1.1  | 8.05  | 2.83  | 6.39  | 1.51  | 7.22  | 16.19 |
| 148 | 6.92  | 2 | 1.9  | 5.42  | 2.11  | 4.90  | 1.91  | 5.16  | 7.13  |
| 149 | 7.23  | 1 | 0.3  | 6.25  | 2.37  |       |       |       |       |
| 150 | 9.63  | 2 | -1.0 | 9.82  | 8.72  | 9.05  | 13.21 | 9.43  | 5.70  |
| 151 | 7.04  | 2 | 0.1  | 10.42 | 6.38  | 8.78  | 4.85  | 9.60  | 12.11 |
| 152 | 6.82  | 1 | -0.6 | 18.48 | 0.03  |       |       |       |       |
| 153 | 9.20  | 2 | 1.1  | 11.11 | 6.32  |       |       |       |       |
| 154 | 10.35 | 2 | 0.1  | 8.02  | 9.86  | 7.12  | 3.98  | 7.57  | 8.42  |
| 155 | 11.05 | 2 | 1.2  | 5.42  | 0.95  | 4.99  | 5.47  | 5.20  | 5.83  |
| 156 | 8.79  | 2 | 0.5  | 14.56 | 10.92 | 12.10 | 1.11  | 13.33 | 13.04 |
| 157 | 7.43  | 2 | -2.3 | 9.12  | 12.66 |       |       |       |       |
| 158 | 10.93 | 1 | 0.2  | 8.69  | 8.50  |       |       |       |       |
| 159 | 8.50  | 1 | -0.3 | 9.43  | 0.97  | 8.53  | 4.99  | 8.98  | 7.09  |
| 160 | 9.84  | 1 | 0.1  | 5.10  | 8.37  |       |       |       |       |
| 161 | 6.64  | 2 | 1.1  | 4.43  | 7.94  | 3.73  | 3.29  | 4.08  | 12.17 |
| 162 | 10.18 | 2 | 2.2  | 12.49 | 6.27  | 10.40 | 3.55  | 11.44 | 12.88 |
| 163 | 9.50  | 2 | 1.4  | 7.06  | 14.04 |       |       |       |       |
| 164 | 8.16  | 1 | -1.7 | 8.19  | 2.72  |       |       |       |       |

|     |       |   |      |       |       |       |       |       |       |
|-----|-------|---|------|-------|-------|-------|-------|-------|-------|
| 165 | 6.29  | 1 | 1.4  | 7.77  | 14.29 | 6.48  | 2.26  | 7.13  | 12.75 |
| 166 | 11.20 | 1 | 1.2  | 12.79 | 15.43 |       |       |       |       |
| 167 | 7.52  | 2 | 1.1  | 8.67  | 4.88  | 7.97  | 0.36  | 8.32  | 5.92  |
| 168 | 8.75  | 1 | -0.4 | 12.52 | 13.24 |       |       |       |       |
| 169 | 8.27  | 2 | 1.1  | 10.35 | 9.68  | 9.38  | 13.67 | 9.86  | 6.97  |
| 170 | 6.45  | 1 | 1.5  | 8.39  | 8.74  | 7.35  | 13.72 | 7.87  | 9.37  |
| 171 | 7.20  | 1 | 1.2  | 6.24  | 11.84 |       |       |       |       |
| 172 | 10.05 | 2 | 1.9  | 5.40  | 9.71  | 4.79  | 3.83  | 5.09  | 8.49  |
| 173 | 9.01  | 1 | -0.2 | 7.24  | 12.30 | 6.56  | 16.28 | 6.90  | 6.93  |
| 174 | 9.01  | 1 | 0.9  | 6.80  | 16.63 | 5.45  | 12.61 | 6.13  | 15.55 |
| 175 | 8.28  | 1 | 0.0  | 6.93  | 3.17  |       |       |       |       |
| 176 | 7.79  | 1 | 1.0  | 5.91  | 7.08  | 5.34  | 7.38  | 5.62  | 7.22  |
| 177 | 8.41  | 1 | -1.3 | 8.64  | 9.46  |       |       |       |       |
| 178 | 7.82  | 1 | 2.0  | 10.15 | 9.68  |       |       |       |       |
| 179 | 7.15  | 1 | -2.6 | 8.22  | 2.86  | 7.32  | 11.55 | 7.77  | 8.14  |
| 180 | 7.53  | 1 | 0.2  | 11.71 | 0.42  | 10.23 | 7.98  | 10.97 | 9.54  |
| 181 | 7.13  | 2 | 0.3  | 6.94  | 10.62 | 6.06  | 11.84 | 6.50  | 9.52  |
| 182 | 9.21  | 1 | 2.0  | 5.05  | 16.73 | 4.09  | 14.32 | 4.57  | 14.91 |
| 183 | 7.90  | 1 | 0.5  | 6.64  | 15.49 |       |       |       |       |
| 184 | 9.17  | 2 | 0.9  | 7.69  | 2.74  | 6.40  | 7.77  | 7.04  | 12.94 |
| 185 | 9.66  | 2 | -0.2 | 11.44 | 11.81 |       |       |       |       |
| 186 | 6.33  | 1 | 0.8  | 8.91  | 13.93 | 7.76  | 8.52  | 8.33  | 9.78  |
| 187 | 9.50  | 2 | -0.6 | 9.57  | 3.39  | 7.77  | 1.70  | 8.67  | 14.71 |
| 188 | 9.27  | 1 | 1.0  | 15.22 | 11.19 | 13.29 | 11.27 | 14.26 | 9.56  |
| 189 | 7.67  | 1 | 2.2  | 8.69  | 5.73  | 7.58  | 1.84  | 8.14  | 9.71  |
| 190 | 6.41  | 2 | 1.8  | 7.14  | 11.89 |       |       |       |       |
| 191 | 6.70  | 2 | 1.2  | 6.46  | 11.35 |       |       |       |       |
| 192 | 10.11 | 1 | -0.5 | 8.23  | 6.19  | 7.23  | 16.24 | 7.73  | 9.16  |
| 193 | 9.62  | 2 | 1.7  | 6.39  | 1.95  | 5.34  | 11.75 | 5.87  | 12.59 |
| 194 | 8.48  | 2 | 1.3  | 11.35 | 15.66 | 10.73 | 7.80  | 11.04 | 3.94  |
| 195 | 7.77  | 2 | -0.6 | 6.23  | 1.49  |       |       |       |       |
| 196 | 9.50  | 2 | -1.5 | 5.99  | 7.47  | 4.96  | 8.83  | 5.47  | 13.21 |
| 197 | 7.68  | 1 | 0.6  | 6.64  | 15.00 |       |       |       |       |

|     |       |   |      |       |       |       |       |       |       |
|-----|-------|---|------|-------|-------|-------|-------|-------|-------|
| 198 | 6.22  | 2 | -2.9 | 8.34  | 5.09  |       |       |       |       |
| 199 | 9.09  | 2 | -1.1 | 7.71  | 11.35 |       |       |       |       |
| 200 | 9.55  | 2 | 0.2  | 9.66  | 6.65  | 8.42  | 0.91  | 9.04  | 9.73  |
| 201 | 10.64 | 2 | 0.5  | 8.11  | 11.53 | 7.49  | 16.00 | 7.80  | 5.66  |
| 202 | 10.64 | 1 | -1.4 | 8.46  | 12.15 | 7.81  | 16.62 | 8.13  | 5.65  |
| 203 | 8.41  | 1 | 0.8  | 9.93  | 2.13  | 8.98  | 1.89  | 9.45  | 7.13  |
| 204 | 7.04  | 1 | 1.0  | 12.42 | 3.54  | 10.48 | 7.70  | 11.45 | 12.00 |
| 205 | 8.45  | 1 | 1.2  | 9.61  | 13.60 | 8.00  | 6.69  | 8.80  | 12.92 |
| 206 | 7.77  | 2 | 0.9  | 10.00 | 16.63 |       |       |       |       |
| 207 | 8.58  | 2 | 1.6  | 7.56  | 6.30  |       |       |       |       |
| 208 | 6.19  | 2 | 0.2  | 10.31 | 2.33  |       |       |       |       |
| 209 | 7.47  | 2 | 0.5  | 12.87 | 6.96  |       |       |       |       |
| 210 | 9.79  | 2 | 0.3  | 7.64  | 6.69  | 6.05  | 12.56 | 6.84  | 16.39 |
| 211 | 7.58  | 2 | 1.1  | 7.15  | 12.11 |       |       |       |       |
| 212 | 6.60  | 2 | -1.6 | 7.08  | 0.96  | 5.83  | 6.85  | 6.46  | 13.75 |
| 213 | 10.75 | 1 | -0.4 | 7.76  | 12.73 | 6.71  | 14.88 | 7.24  | 10.24 |
| 214 | 6.41  | 1 | -0.6 | 8.81  | 3.84  | 7.31  | 0.86  | 8.06  | 13.23 |
| 215 | 8.50  | 1 | 1.9  | 7.99  | 16.96 |       |       |       |       |
| 216 | 6.55  | 2 | 0.7  | 5.45  | 10.18 |       |       |       |       |
| 217 | 7.15  | 2 | -0.9 | 13.91 | 0.60  | 12.80 | 3.92  | 13.35 | 5.85  |
| 218 | 6.89  | 2 | 0.0  | 5.85  | 4.87  | 4.69  | 10.74 | 5.27  | 15.56 |
| 219 | 10.81 | 1 | 1.3  | 7.98  | 15.07 |       |       |       |       |
| 220 | 8.43  | 2 | 0.1  | 26.13 | 2.15  | 21.36 | 15.26 | 23.74 | 14.20 |
| 221 | 6.90  | 1 | 1.5  | 10.82 | 9.69  |       |       |       |       |
| 222 | 11.24 | 2 | 0.4  | 9.64  | 16.97 |       |       |       |       |
| 223 | 10.17 | 2 | -1.0 | 12.30 | 1.05  | 10.75 | 8.61  | 11.53 | 9.53  |
| 224 | 8.24  | 1 | -1.4 | 11.14 | 10.91 | 9.26  | 1.10  | 10.20 | 13.04 |
| 225 | 7.04  | 1 | -1.7 | 21.92 | 3.31  | 17.95 | 3.01  | 19.94 | 14.10 |
| 226 | 8.14  | 2 | -0.7 | 7.08  | 9.09  |       |       |       |       |
| 227 | 7.09  | 2 | 0.3  | 8.19  | 14.64 |       |       |       |       |
| 228 | 6.12  | 1 | -0.3 | 9.37  | 9.86  | 7.65  | 9.07  | 8.51  | 14.31 |
| 229 | 7.27  | 2 | -0.5 | 3.19  | 11.82 | 2.65  | 2.02  | 2.92  | 13.07 |
| 230 | 10.63 | 1 | 1.9  | 2.40  | 8.65  | 2.21  | 13.14 | 2.30  | 5.70  |

|     |       |   |      |       |       |       |       |       |       |
|-----|-------|---|------|-------|-------|-------|-------|-------|-------|
| 231 | 9.22  | 2 | 0.3  | 9.92  | 11.04 | 8.63  | 3.50  | 9.28  | 9.85  |
| 232 | 8.09  | 1 | -0.3 | 9.26  | 1.72  | 7.54  | 3.75  | 8.40  | 14.51 |
| 233 | 9.90  | 1 | 0.3  | 8.73  | 3.50  | 7.62  | 4.06  | 8.17  | 9.65  |
| 234 | 6.37  | 1 | 0.4  | 5.42  | 9.66  |       |       |       |       |
| 235 | 11.00 | 1 | -1.3 | 2.82  | 2.22  | 2.39  | 13.42 | 2.60  | 11.77 |
| 236 | 7.30  | 2 | 2.1  | 4.16  | 13.19 |       |       |       |       |
| 237 | 10.96 | 1 | 2.5  | 6.00  | 2.70  | 5.53  | 7.21  | 5.76  | 5.80  |
| 238 | 9.67  | 1 | 0.4  | 11.69 | 7.85  | 10.78 | 12.34 | 11.23 | 5.72  |
| 239 | 9.20  | 2 | 1.5  | 3.32  | 12.03 | 2.79  | 0.82  | 3.05  | 12.34 |
| 240 | 9.79  | 1 | 0.5  | 9.81  | 0.84  | 8.57  | 8.40  | 9.19  | 9.53  |
| 241 | 10.92 | 1 | 1.3  | 17.55 | 12.02 | 15.54 | 3.01  | 16.55 | 8.57  |
| 242 | 10.92 | 1 | -1.3 | 5.23  | 4.78  | 4.44  | 5.51  | 4.83  | 11.63 |
| 243 | 11.43 | 2 | 0.7  | 3.98  | 0.16  | 3.54  | 11.12 | 3.76  | 8.25  |
| 244 | 8.40  | 2 | 0.5  | 9.18  | 1.20  | 7.66  | 4.69  | 8.42  | 12.72 |
| 245 | 8.90  | 2 | -0.4 | 1.86  | 2.69  | 1.57  | 8.54  | 1.72  | 11.97 |
| 246 | 7.25  | 2 | -1.1 | 16.73 | 16.45 | 14.30 | 16.07 | 15.51 | 11.06 |
| 247 | 10.17 | 1 | -2.2 | 9.03  | 4.91  | 8.15  | 0.89  | 8.59  | 7.17  |
| 248 | 8.42  | 1 | -0.4 | 6.13  | 13.45 |       |       |       |       |
| 249 | 7.07  | 2 | 1.5  | 10.52 | 0.10  | 8.66  | 3.53  | 9.59  | 13.71 |
| 250 | 9.46  | 1 | 1.0  | 5.08  | 8.90  | 4.30  | 9.04  | 4.69  | 11.70 |
| 251 | 6.63  | 2 | -0.5 | 16.47 | 13.49 | 13.25 | 13.64 | 14.86 | 15.34 |
| 252 | 7.30  | 2 | -0.2 | 12.21 | 7.75  | 11.26 | 12.24 | 11.73 | 5.72  |
| 253 | 7.50  | 1 | 1.5  | 4.85  | 3.26  | 4.46  | 1.26  | 4.66  | 5.89  |
| 254 | 7.43  | 1 | 0.4  | 13.93 | 7.58  | 11.72 | 3.65  | 12.82 | 12.16 |
| 255 | 8.42  | 1 | 2.2  | 6.19  | 6.91  | 5.16  | 2.92  | 5.67  | 12.90 |
| 256 | 7.76  | 2 | 0.4  | 9.18  | 10.62 | 8.29  | 6.62  | 8.74  | 7.25  |
| 257 | 9.11  | 1 | 1.5  | 10.87 | 11.28 |       |       |       |       |
| 258 | 7.82  | 2 | 0.6  | 3.42  | 13.63 |       |       |       |       |
| 259 | 7.86  | 2 | 1.3  | 6.94  | 3.60  | 6.07  | 11.15 | 6.50  | 9.46  |
| 260 | 9.46  | 2 | -0.7 | 5.50  | 6.32  | 4.40  | 3.72  | 4.95  | 15.76 |
| 261 | 7.80  | 1 | -1.0 | 8.74  | 16.77 | 9.36  | 13.55 | 9.05  | 4.82  |
| 262 | 7.54  | 1 | 0.1  | 4.85  | 16.31 | 4.21  | 6.12  | 4.53  | 9.97  |
| 263 | 6.14  | 2 | 0.9  | 9.98  | 1.97  |       |       |       |       |



|     |       |   |      |       |       |       |       |       |       |
|-----|-------|---|------|-------|-------|-------|-------|-------|-------|
| 264 | 8.95  | 2 | -1.2 | 3.69  | 12.30 | 3.39  | 7.81  | 3.54  | 6.04  |
| 265 | 7.84  | 2 | -0.4 | 8.33  | 3.81  | 7.53  | 0.21  | 7.93  | 7.16  |
| 266 | 8.92  | 1 | -2.5 | 8.01  | 5.57  | 6.71  | 15.34 | 7.36  | 12.47 |
| 267 | 7.18  | 1 | 0.7  | 9.90  | 5.99  | 8.34  | 5.24  | 9.12  | 12.10 |
| 268 | 10.09 | 2 | 1.4  | 7.49  | 4.54  |       |       |       |       |
| 269 | 7.50  | 1 | -0.3 | 15.77 | 14.87 |       |       |       |       |
| 270 | 7.60  | 2 | 0.7  | 11.10 | 8.16  |       |       |       |       |
| 271 | 7.06  | 2 | -0.7 | 3.95  | 2.78  | 3.64  | 1.73  | 3.79  | 5.89  |
| 272 | 6.87  | 1 | 0.2  | 4.89  | 2.87  | 4.13  | 8.36  | 4.51  | 11.97 |
| 273 | 10.31 | 1 | 1.7  | 6.05  | 0.34  |       |       |       |       |
| 274 | 6.47  | 1 | 1.9  | 5.67  | 13.15 |       |       |       |       |
| 275 | 7.30  | 1 | 0.8  | 9.97  | 9.99  | 9.16  | 5.49  | 9.56  | 6.00  |
| 276 | 8.24  | 1 | 1.2  | 5.33  | 16.54 |       |       |       |       |
| 277 | 10.80 | 1 | 2.0  | 4.84  | 9.47  | 4.03  | 0.35  | 4.44  | 12.99 |
| 278 | 7.46  | 2 | 1.2  | 7.34  | 9.44  | 6.65  | 13.44 | 7.00  | 6.97  |
| 279 | 8.91  | 1 | 0.4  | 8.97  | 14.02 |       |       |       |       |
| 280 | 9.31  | 2 | 0.6  | 4.99  | 2.38  | 4.20  | 3.51  | 4.59  | 12.15 |
| 281 | 8.02  | 1 | -0.3 | 6.38  | 2.92  | 5.58  | 10.46 | 5.98  | 9.48  |
| 282 | 8.87  | 1 | 0.8  | 8.94  | 16.68 |       |       |       |       |
| 283 | 7.68  | 1 | -0.4 | 5.60  | 7.94  | 4.91  | 14.51 | 5.25  | 9.30  |
| 284 | 8.62  | 1 | -0.6 | 6.06  | 2.45  | 5.29  | 5.11  | 5.68  | 9.62  |
| 285 | 7.38  | 2 | 0.5  | 11.53 | 9.96  | 10.03 | 2.41  | 10.78 | 9.82  |
| 286 | 9.30  | 1 | -0.7 | 13.30 | 4.37  | 11.09 | 5.45  | 12.20 | 12.81 |
| 287 | 6.17  | 1 | 0.5  | 10.43 | 13.92 |       |       |       |       |
| 288 | 7.80  | 1 | 0.1  | 13.45 | 3.90  |       |       |       |       |
| 289 | 6.15  | 2 | -1.1 | 8.04  | 10.88 | 7.03  | 11.58 | 7.53  | 9.54  |
| 290 | 7.35  | 1 | 2.0  | 9.24  | 15.54 |       |       |       |       |
| 291 | 10.20 | 1 | -0.2 | 7.17  | 6.97  | 6.28  | 14.49 | 6.72  | 9.37  |
| 292 | 8.18  | 2 | 1.7  | 7.93  | 0.70  | 7.17  | 4.72  | 7.55  | 7.09  |
| 293 | 8.35  | 1 | 1.4  | 14.69 | 1.10  | 12.60 | 10.14 | 13.65 | 10.86 |
| 294 | 9.74  | 2 | 1.7  | 20.89 | 12.16 | 18.52 | 9.58  | 19.70 | 8.52  |
| 295 | 6.44  | 1 | 0.9  | 5.72  | 12.34 | 5.28  | 16.81 | 5.50  | 5.65  |
| 296 | 11.40 | 1 | 0.8  | 7.43  | 10.68 |       |       |       |       |

|     |       |   |      |       |       |       |       |       |       |
|-----|-------|---|------|-------|-------|-------|-------|-------|-------|
| 297 | 10.46 | 1 | 1.1  | 9.04  | 15.38 | 7.43  | 12.68 | 8.23  | 13.79 |
| 298 | 9.97  | 1 | 0.8  | 8.35  | 6.48  | 7.54  | 7.98  | 7.94  | 7.19  |
| 299 | 7.30  | 2 | -0.2 | 4.27  | 6.18  | 3.59  | 5.05  | 3.93  | 12.10 |
| 300 | 10.01 | 1 | 0.0  | 11.05 | 3.91  | 10.18 | 8.42  | 10.62 | 5.78  |
| 301 | 9.44  | 1 | 0.0  | 11.69 | 13.61 | 9.47  | 1.13  | 10.58 | 14.85 |
| 302 | 8.26  | 2 | 0.4  | 5.79  | 3.35  | 5.24  | 7.36  | 5.51  | 7.06  |
| 303 | 8.16  | 1 | -1.0 | 7.00  | 15.00 | 5.99  | 11.21 | 6.50  | 10.93 |
| 304 | 6.23  | 2 | 0.4  | 14.17 | 10.19 |       |       |       |       |
| 305 | 9.88  | 1 | 1.0  | 7.76  | 3.77  | 6.27  | 9.65  | 7.02  | 15.06 |
| 306 | 9.30  | 2 | 1.7  | 14.72 | 2.32  | 13.56 | 6.83  | 14.14 | 5.80  |
| 307 | 6.00  | 1 | 2.1  | 10.94 | 16.03 | 10.14 | 9.39  | 10.54 | 5.40  |
| 308 | 9.21  | 1 | -0.2 | 7.88  | 5.91  | 6.63  | 12.70 | 7.25  | 12.20 |
| 309 | 6.80  | 1 | 2.2  | 8.64  | 0.44  |       |       |       |       |
| 310 | 8.47  | 2 | 1.5  | 7.92  | 9.42  | 6.89  | 1.87  | 7.41  | 9.81  |
| 311 | 10.20 | 2 | 0.4  | 9.42  | 10.74 | 8.70  | 15.21 | 9.06  | 5.67  |
| 312 | 7.70  | 1 | 0.0  | 9.31  | 6.92  | 8.59  | 11.41 | 8.95  | 5.73  |
| 313 | 10.77 | 2 | 1.0  | 9.39  | 7.87  | 8.48  | 3.86  | 8.94  | 7.21  |
| 314 | 7.19  | 2 | 1.3  | 7.52  | 12.11 | 6.81  | 16.09 | 7.16  | 6.93  |
| 315 | 6.22  | 2 | 0.9  | 11.19 | 8.43  |       |       |       |       |
| 316 | 11.25 | 1 | -0.9 | 7.11  | 4.47  | 6.56  | 8.98  | 6.83  | 5.77  |
| 317 | 11.02 | 2 | 0.9  | 5.02  | 16.09 |       |       |       |       |
| 318 | 8.88  | 2 | 0.6  | 11.06 | 5.85  |       |       |       |       |
| 319 | 7.21  | 1 | -1.0 | 5.68  | 4.69  |       |       |       |       |
| 320 | 6.47  | 2 | 0.1  | 6.80  | 9.34  | 5.77  | 3.19  | 6.28  | 11.51 |
| 321 | 9.34  | 2 | 2.5  | 10.39 | 11.35 | 8.64  | 1.55  | 9.52  | 13.05 |
| 322 | 6.60  | 1 | 0.5  | 12.99 | 5.13  | 10.75 | 0.66  | 11.87 | 13.36 |
| 323 | 8.93  | 2 | 1.0  | 7.45  | 7.28  | 6.53  | 14.80 | 6.99  | 9.36  |
| 324 | 9.23  | 1 | 2.0  | 11.14 | 11.95 |       |       |       |       |
| 325 | 10.14 | 2 | 0.6  | 11.81 | 2.09  | 10.88 | 6.60  | 11.34 | 5.81  |
| 326 | 6.09  | 1 | 0.9  | 15.55 | 15.54 |       |       |       |       |
| 327 | 10.11 | 1 | 1.5  | 6.54  | 8.38  | 5.73  | 14.08 | 6.13  | 9.34  |
| 328 | 8.92  | 1 | 1.9  | 4.60  | 6.71  | 3.83  | 3.11  | 4.21  | 12.89 |
| 329 | 6.84  | 1 | 1.5  | 10.75 | 9.14  | 9.70  | 5.13  | 10.23 | 7.23  |

|     |       |   |      |       |       |       |       |       |       |
|-----|-------|---|------|-------|-------|-------|-------|-------|-------|
| 330 | 8.92  | 2 | 1.0  | 9.45  | 2.37  | 8.54  | 1.65  | 9.00  | 7.14  |
| 331 | 11.23 | 2 | -0.6 | 7.62  | 6.42  | 6.64  | 1.14  | 7.13  | 9.73  |
| 332 | 7.10  | 2 | 0.3  | 9.57  | 15.58 | 7.74  | 12.65 | 8.65  | 14.95 |
| 333 | 7.37  | 2 | -0.5 | 10.30 | 6.21  | 9.05  | 16.22 | 9.68  | 9.17  |
| 334 | 10.92 | 2 | -0.7 | 10.46 | 1.13  | 8.65  | 3.15  | 9.55  | 13.40 |
| 335 | 11.00 | 1 | 1.6  | 6.61  | 10.87 | 5.99  | 14.85 | 6.30  | 6.95  |
| 336 | 9.32  | 1 | 0.5  | 15.62 | 2.85  | 14.12 | 1.17  | 14.87 | 7.14  |
| 337 | 7.08  | 2 | -0.1 | 6.61  | 5.91  | 5.97  | 1.89  | 6.29  | 7.19  |
| 338 | 8.58  | 1 | 0.7  | 10.71 | 4.06  | 9.68  | 0.04  | 10.19 | 7.16  |
| 339 | 6.70  | 1 | 0.3  | 9.65  | 7.16  |       |       |       |       |
| 340 | 8.01  | 1 | 1.2  | 10.20 | 12.90 | 8.87  | 5.37  | 9.53  | 9.90  |
| 341 | 7.24  | 1 | 1.5  | 6.40  | 1.43  | 5.41  | 9.79  | 5.90  | 11.92 |
| 342 | 6.67  | 2 | 1.0  | 13.96 | 13.01 | 12.17 | 9.45  | 13.06 | 9.71  |
| 343 | 6.71  | 2 | 0.2  | 12.37 | 8.76  | 11.20 | 12.75 | 11.79 | 6.98  |
| 344 | 8.56  | 1 | -0.6 | 10.77 | 9.76  |       |       |       |       |
| 345 | 7.20  | 1 | -0.4 | 11.78 | 6.96  | 10.26 | 0.60  | 11.02 | 9.74  |
| 346 | 6.46  | 1 | -2.2 | 15.00 | 4.22  |       |       |       |       |
| 347 | 6.67  | 2 | 1.8  | 7.27  | 15.30 | 6.31  | 7.79  | 6.79  | 9.96  |
| 348 | 6.90  | 1 | 1.5  | 17.06 | 5.18  | 14.87 | 2.38  | 15.96 | 9.69  |
| 349 | 9.88  | 2 | 0.3  | 12.75 | 5.22  | 11.11 | 2.35  | 11.93 | 9.69  |
| 350 | 7.46  | 2 | -0.6 | 8.02  | 3.93  |       |       |       |       |
| 351 | 7.01  | 1 | 2.8  | 6.42  | 6.22  | 5.35  | 3.61  | 5.89  | 12.88 |
| 352 | 7.97  | 2 | 0.1  | 12.08 | 7.80  | 10.58 | 15.31 | 11.33 | 9.35  |
| 353 | 6.80  | 1 | -0.4 | 6.97  | 15.61 |       |       |       |       |
| 354 | 8.98  | 1 | 1.6  | 11.55 | 13.10 | 10.04 | 5.57  | 10.79 | 9.90  |
| 355 | 6.76  | 1 | 0.0  | 11.65 | 15.61 | 9.60  | 10.26 | 10.62 | 13.61 |
| 356 | 8.30  | 1 | 1.8  | 4.88  | 2.76  | 4.12  | 3.13  | 4.50  | 11.97 |
| 357 | 7.31  | 2 | -0.2 | 9.28  | 4.66  |       |       |       |       |
| 358 | 7.80  | 1 | 0.4  | 10.10 | 10.81 |       |       |       |       |
| 359 | 6.99  | 2 | -1.0 | 5.16  | 16.36 |       |       |       |       |
| 360 | 9.22  | 1 | 0.7  | 7.26  | 7.43  | 6.33  | 1.55  | 6.79  | 9.65  |
| 361 | 6.75  | 2 | 0.8  | 12.32 | 7.11  |       |       |       |       |
| 362 | 8.79  | 2 | 0.5  | 7.52  | 3.92  | 6.27  | 5.90  | 6.90  | 12.80 |

|     |       |   |      |       |       |       |       |       |       |
|-----|-------|---|------|-------|-------|-------|-------|-------|-------|
| 363 | 9.68  | 1 | 0.4  | 5.14  | 10.02 | 4.66  | 14.02 | 4.90  | 6.96  |
| 364 | 8.69  | 1 | -1.3 | 14.57 | 15.47 | 12.41 | 7.15  | 13.49 | 11.34 |
| 365 | 8.30  | 2 | 2.4  | 8.79  | 10.86 | 7.38  | 0.36  | 8.08  | 12.29 |
| 366 | 7.47  | 2 | 1.2  | 4.14  | 10.97 | 3.70  | 5.10  | 3.92  | 7.84  |
| 367 | 8.27  | 1 | 2.1  | 10.42 | 6.07  | 8.68  | 3.75  | 9.55  | 12.87 |
| 368 | 8.88  | 2 | 0.7  | 13.52 | 5.33  | 10.81 | 11.20 | 12.16 | 15.77 |
| 369 | 8.54  | 1 | -0.3 | 7.12  | 1.73  | 6.44  | 5.75  | 6.78  | 7.08  |
| 370 | 7.78  | 2 | 1.6  | 19.72 | 2.48  | 17.43 | 1.82  | 18.57 | 8.69  |
| 371 | 8.42  | 1 | -0.2 | 9.15  | 7.26  | 8.02  | 14.78 | 8.59  | 9.36  |
| 372 | 11.45 | 1 | -1.2 | 8.77  | 16.55 | 7.30  | 6.21  | 8.03  | 12.86 |
| 373 | 6.60  | 2 | 1.3  | 5.14  | 12.86 |       |       |       |       |
| 374 | 10.21 | 2 | -0.9 | 14.16 | 1.26  | 11.82 | 8.56  | 12.99 | 12.71 |
| 375 | 8.53  | 1 | 1.3  | 6.57  | 15.41 | 5.44  | 13.88 | 6.01  | 13.39 |
| 376 | 7.60  | 2 | 1.4  | 5.22  | 6.23  |       |       |       |       |
| 377 | 9.19  | 2 | 0.7  | 15.78 | 16.23 | 13.18 | 9.33  | 14.48 | 12.70 |
| 378 | 7.70  | 1 | -0.9 | 8.18  | 13.37 | 6.63  | 11.78 | 7.40  | 14.84 |
| 379 | 7.68  | 1 | -0.3 | 5.69  | 9.85  | 4.78  | 9.43  | 5.23  | 12.22 |
| 380 | 8.16  | 2 | -0.6 | 7.82  | 11.63 | 7.09  | 15.61 | 7.45  | 6.94  |
| 381 | 7.30  | 1 | 2.4  | 4.69  | 1.55  | 4.09  | 9.10  | 4.39  | 9.51  |
| 382 | 7.60  | 2 | 0.1  | 6.81  | 7.39  |       |       |       |       |
| 383 | 8.75  | 1 | 0.5  | 4.89  | 6.78  | 3.98  | 4.65  | 4.43  | 14.52 |
| 384 | 8.70  | 1 | 0.0  | 4.84  | 2.66  |       |       |       |       |
| 385 | 9.56  | 1 | -0.1 | 15.89 | 6.08  | 14.39 | 10.09 | 15.14 | 7.02  |
| 386 | 8.50  | 1 | 0.8  | 4.47  | 11.61 |       |       |       |       |
| 387 | 11.30 | 1 | 0.1  | 7.54  | 1.33  | 6.30  | 11.14 | 6.92  | 12.62 |
| 388 | 7.60  | 2 | -0.4 | 5.26  | 10.84 |       |       |       |       |
| 389 | 8.71  | 2 | -0.6 | 11.99 | 14.23 | 9.58  | 11.66 | 10.79 | 15.83 |
| 390 | 8.91  | 2 | 0.0  | 6.32  | 6.89  | 5.50  | 0.67  | 5.91  | 9.74  |
| 391 | 11.50 | 1 | -0.6 | 13.19 | 15.47 |       |       |       |       |
| 392 | 9.10  | 1 | -1.1 | 13.14 | 15.72 | 11.41 | 8.21  | 12.28 | 9.97  |
| 393 | 10.02 | 2 | 0.9  | 9.64  | 2.42  | 8.07  | 12.22 | 8.86  | 12.58 |
| 394 | 10.80 | 2 | 1.3  | 6.61  | 7.62  |       |       |       |       |
| 395 | 7.51  | 2 | 0.7  | 7.20  | 8.08  | 6.06  | 3.16  | 6.63  | 12.18 |

|     |       |   |      |       |       |       |       |       |       |
|-----|-------|---|------|-------|-------|-------|-------|-------|-------|
| 396 | 10.80 | 2 | -1.1 | 4.13  | 16.60 | 3.42  | 6.84  | 3.78  | 13.24 |
| 397 | 8.29  | 2 | 2.3  | 11.59 | 5.06  | 10.14 | 12.60 | 10.87 | 9.42  |
| 398 | 9.58  | 2 | 0.7  | 7.17  | 1.63  | 6.08  | 9.16  | 6.62  | 11.65 |
| 399 | 10.40 | 1 | 0.7  | 9.64  | 6.74  | 8.09  | 16.50 | 8.86  | 12.43 |
| 400 | 10.56 | 1 | 1.6  | 9.63  | 1.67  |       |       |       |       |
| 401 | 7.39  | 2 | 2.6  | 12.53 | 15.00 |       |       |       |       |
| 402 | 10.58 | 1 | 1.9  | 7.78  | 3.34  | 6.46  | 7.96  | 7.12  | 13.15 |
| 403 | 6.41  | 2 | 0.4  | 9.76  | 7.42  |       |       |       |       |
| 404 | 10.83 | 2 | 2.0  | 10.12 | 6.41  |       |       |       |       |
| 405 | 8.25  | 1 | 1.9  | 6.53  | 1.46  | 5.44  | 4.07  | 5.99  | 12.77 |
| 406 | 6.87  | 2 | -0.2 | 13.60 | 2.96  |       |       |       |       |
| 407 | 6.18  | 1 | -0.5 | 12.60 | 5.73  | 10.31 | 7.07  | 11.46 | 14.16 |
| 408 | 5.86  | 2 | -0.1 | 4.55  | 15.28 | 3.97  | 9.74  | 4.26  | 9.52  |
| 409 | 9.09  | 2 | -0.2 | 7.99  | 15.29 | 6.76  | 16.35 | 7.38  | 11.85 |
| 410 | 8.05  | 1 | 0.3  | 3.43  | 12.66 | 3.11  | 6.80  | 3.27  | 6.96  |
| 411 | 7.55  | 2 | -0.9 | 10.60 | 3.38  | 8.58  | 9.26  | 9.59  | 14.87 |
| 412 | 8.71  | 2 | -1.3 | 8.67  | 0.58  | 7.25  | 10.39 | 7.96  | 12.64 |
| 413 | 7.70  | 2 | -1.1 | 5.86  | 2.72  | 4.89  | 7.11  | 5.37  | 12.76 |
| 414 | 6.80  | 1 | 2.5  | 13.18 | 14.31 |       |       |       |       |
| 415 | 6.17  | 2 | -0.8 | 27.16 | 4.08  | 23.36 | 3.51  | 25.26 | 10.63 |
| 416 | 10.12 | 1 | 0.3  | 4.67  | 6.22  |       |       |       |       |
| 417 | 7.70  | 2 | 0.6  | 12.40 | 0.68  |       |       |       |       |
| 418 | 6.50  | 1 | 0.7  | 5.65  | 5.17  | 4.92  | 2.40  | 5.28  | 9.69  |
| 419 | 7.97  | 1 | 1.2  | 9.48  | 13.71 |       |       |       |       |
| 420 | 10.80 | 2 | 0.1  | 6.63  | 10.23 | 6.12  | 14.71 | 6.38  | 5.68  |
| 421 | 9.02  | 1 | 1.5  | 8.12  | 2.32  | 7.09  | 5.24  | 7.60  | 9.62  |
| 422 | 9.90  | 2 | 0.3  | 7.23  | 10.08 |       |       |       |       |
| 423 | 6.70  | 1 | 1.0  | 8.75  | 10.35 | 7.35  | 0.88  | 8.05  | 12.27 |
| 424 | 7.80  | 2 | 2.2  | 9.19  | 9.77  | 7.72  | 1.45  | 8.45  | 12.25 |
| 425 | 8.00  | 2 | 0.9  | 5.22  | 2.04  | 4.42  | 13.24 | 4.82  | 11.78 |
| 426 | 6.57  | 1 | 0.5  | 8.08  | 10.93 | 6.79  | 0.29  | 7.44  | 12.29 |
| 427 | 9.56  | 1 | 1.4  | 5.46  | 9.56  | 5.04  | 14.05 | 5.25  | 5.69  |
| 428 | 8.35  | 2 | 1.8  | 6.21  | 6.33  | 5.22  | 15.03 | 5.72  | 12.33 |

|     |       |   |      |       |       |       |       |       |       |
|-----|-------|---|------|-------|-------|-------|-------|-------|-------|
| 429 | 6.75  | 1 | -1.6 | 6.98  | 8.69  | 6.07  | 1.13  | 6.53  | 9.79  |
| 430 | 8.49  | 2 | 1.0  | 5.60  | 13.50 |       |       |       |       |
| 431 | 8.45  | 1 | 0.4  | 7.02  | 6.15  | 6.36  | 10.16 | 6.69  | 7.02  |
| 432 | 10.50 | 2 | 2.8  | 12.46 | 10.48 | 10.36 | 0.67  | 11.41 | 13.02 |
| 433 | 5.74  | 2 | -0.8 | 5.14  | 8.94  | 4.27  | 10.27 | 4.71  | 13.13 |
| 434 | 7.99  | 1 | 1.0  | 6.23  | 10.61 |       |       |       |       |
| 435 | 5.92  | 2 | 0.6  | 9.13  | 1.73  | 7.53  | 8.62  | 8.33  | 13.56 |
| 436 | 6.50  | 2 | 0.6  | 7.63  | 1.84  | 6.89  | 2.18  | 7.26  | 7.13  |
| 437 | 6.88  | 2 | -0.7 | 9.93  | 15.33 | 8.04  | 11.43 | 8.99  | 14.93 |
| 438 | 9.03  | 1 | 0.2  | 10.86 | 3.07  | 9.67  | 12.88 | 10.27 | 8.21  |
| 439 | 7.54  | 2 | -1.3 | 12.40 | 3.58  |       |       |       |       |
| 440 | 8.42  | 2 | 1.7  | 9.75  | 16.56 |       |       |       |       |
| 441 | 6.41  | 2 | -0.8 | 10.00 | 5.46  |       |       |       |       |
| 442 | 7.67  | 1 | 1.0  | 8.51  | 0.14  |       |       |       |       |
| 443 | 6.92  | 1 | 1.2  | 12.41 | 6.30  |       |       |       |       |
| 444 | 9.84  | 2 | 1.1  | 9.33  | 11.96 |       |       |       |       |
| 445 | 8.14  | 2 | 1.7  | 13.13 | 2.20  |       |       |       |       |
| 446 | 7.00  | 1 | 0.1  | 6.25  | 5.49  | 5.25  | 8.81  | 5.75  | 12.27 |
| 447 | 6.58  | 2 | 1.7  | 10.25 | 16.19 | 8.58  | 10.45 | 9.41  | 12.51 |
| 448 | 8.09  | 2 | -0.5 | 7.72  | 15.84 |       |       |       |       |
| 449 | 9.68  | 2 | 1.7  | 8.41  | 0.35  | 6.98  | 5.54  | 7.70  | 13.13 |
| 450 | 6.73  | 2 | -1.1 | 8.58  | 0.64  |       |       |       |       |
| 451 | 8.75  | 1 | 1.7  | 9.45  | 11.36 | 8.15  | 0.56  | 8.80  | 10.39 |
| 452 | 7.08  | 2 | -0.6 | 12.70 | 8.56  | 11.50 | 12.56 | 12.10 | 6.98  |
| 453 | 8.60  | 1 | 0.0  | 8.54  | 8.53  | 7.84  | 4.03  | 8.19  | 5.98  |
| 454 | 7.81  | 2 | 1.1  | 6.60  | 15.50 |       |       |       |       |
| 455 | 10.90 | 1 | 0.9  | 8.24  | 16.12 |       |       |       |       |
| 456 | 10.95 | 2 | 1.0  | 6.88  | 12.94 |       |       |       |       |
| 457 | 7.52  | 1 | 1.1  | 9.33  | 6.13  |       |       |       |       |
| 458 | 9.20  | 1 | 0.1  | 6.79  | 5.66  | 5.65  | 4.16  | 6.22  | 12.86 |
| 459 | 9.48  | 2 | 0.1  | 11.34 | 5.13  | 9.56  | 2.04  | 10.45 | 12.02 |
| 460 | 6.05  | 1 | 0.3  | 11.77 | 6.47  | 10.33 | 15.97 | 11.05 | 9.19  |
| 461 | 8.70  | 1 | 0.4  | 6.91  | 1.30  | 5.84  | 12.51 | 6.38  | 11.81 |

|     |       |   |      |       |       |       |       |  |       |       |
|-----|-------|---|------|-------|-------|-------|-------|--|-------|-------|
| 462 | 6.25  | 2 | -1.6 | 10.97 | 16.54 |       |       |  |       |       |
| 463 | 8.43  | 2 | 0.6  | 9.50  | 1.11  | 8.59  | 5.13  |  | 9.05  | 7.09  |
| 464 | 6.69  | 2 | -0.3 | 6.57  | 11.97 | 5.51  | 0.76  |  | 6.04  | 12.33 |
| 465 | 9.14  | 1 | 1.1  | 8.68  | 11.87 | 7.87  | 15.85 |  | 8.28  | 6.94  |
| 466 | 7.58  | 2 | 0.5  | 5.98  | 8.65  | 5.03  | 15.52 |  | 5.51  | 12.14 |
| 467 | 9.97  | 1 | 0.0  | 5.75  | 1.11  | 5.29  | 3.41  |  | 5.52  | 5.86  |
| 468 | 7.09  | 2 | 0.2  | 12.56 | 11.13 |       |       |  |       |       |
| 469 | 11.32 | 1 | 1.5  | 10.96 | 15.19 |       |       |  |       |       |
| 470 | 6.76  | 2 | 0.6  | 7.97  | 9.58  |       |       |  |       |       |
| 471 | 10.83 | 1 | -0.8 | 12.39 | 8.69  | 10.91 | 4.72  |  | 11.65 | 8.96  |
| 472 | 9.08  | 1 | 0.8  | 8.76  | 7.57  | 6.90  | 13.43 |  | 7.83  | 16.78 |
| 473 | 8.30  | 2 | 1.0  | 9.75  | 12.47 | 8.48  | 4.94  |  | 9.11  | 9.89  |
| 474 | 6.67  | 1 | 1.6  | 8.10  | 2.98  | 7.24  | 11.82 |  | 7.67  | 7.94  |
| 475 | 6.90  | 1 | 0.1  | 6.29  | 8.84  | 5.48  | 1.29  |  | 5.88  | 9.79  |
| 476 | 9.12  | 1 | 0.0  | 7.51  | 6.98  |       |       |  |       |       |
| 477 | 6.81  | 1 | 0.3  | 13.88 | 5.75  | 12.79 | 10.25 |  | 13.34 | 5.75  |
| 478 | 10.36 | 2 | 1.0  | 10.30 | 9.39  |       |       |  |       |       |
| 479 | 7.81  | 2 | -1.1 | 10.36 | 2.45  | 9.36  | 1.57  |  | 9.86  | 7.14  |
| 480 | 6.16  | 1 | 1.6  | 20.21 | 6.45  |       |       |  |       |       |
| 481 | 7.49  | 2 | 0.7  | 11.79 | 4.16  | 10.85 | 0.36  |  | 11.32 | 5.91  |
| 482 | 8.93  | 2 | 1.6  | 16.23 | 15.72 |       |       |  |       |       |
| 483 | 6.83  | 1 | -0.1 | 13.43 | 9.35  | 12.17 | 13.35 |  | 12.80 | 6.97  |
| 484 | 10.71 | 1 | -1.0 | 5.02  | 3.21  | 4.19  | 6.61  |  | 4.60  | 12.77 |
| 485 | 10.70 | 2 | -2.3 | 6.66  | 5.62  | 5.72  | 14.01 |  | 6.19  | 10.67 |
| 486 | 7.80  | 2 | -0.4 | 8.61  | 14.20 | 7.13  | 12.53 |  | 7.87  | 13.28 |
| 487 | 6.13  | 1 | -1.3 | 11.30 | 3.77  | 9.45  | 9.38  |  | 10.38 | 12.61 |
| 488 | 9.30  | 1 | -0.3 | 7.91  | 12.40 | 6.87  | 4.87  |  | 7.39  | 9.89  |
| 489 | 9.64  | 2 | -0.4 | 9.68  | 0.70  | 8.91  | 5.21  |  | 9.29  | 5.83  |
| 490 | 8.03  | 1 | 0.4  | 9.84  | 1.78  | 8.32  | 12.99 |  | 9.08  | 11.79 |
| 491 | 8.42  | 2 | 1.3  | 14.76 | 10.57 | 13.38 | 14.56 |  | 14.07 | 6.95  |
| 492 | 9.20  | 2 | 1.8  | 7.84  | 16.96 |       |       |  |       |       |
| 493 | 9.91  | 2 | 0.0  | 4.39  | 12.31 |       |       |  |       |       |
| 494 | 9.10  | 2 | 2.4  | 2.83  | 12.62 |       |       |  |       |       |

|     |       |   |      |       |       |       |       |       |       |  |
|-----|-------|---|------|-------|-------|-------|-------|-------|-------|--|
| 495 | 9.10  | 2 | 1.6  | 5.69  | 1.05  |       |       |       |       |  |
| 496 | 7.17  | 2 | -1.2 | 10.78 | 5.71  | 9.14  | 16.88 | 9.96  | 11.64 |  |
| 497 | 11.78 | 1 | 2.0  | 6.93  | 2.16  | 6.26  | 1.87  | 6.60  | 7.13  |  |
| 498 | 6.96  | 2 | -1.1 | 10.27 | 1.21  |       |       |       |       |  |
| 499 | 7.41  | 2 | 1.3  | 8.96  | 16.80 |       |       |       |       |  |
| 500 | 7.42  | 1 | 1.4  | 5.87  | 0.64  | 4.89  | 5.25  | 5.38  | 12.99 |  |
| 501 | 10.75 | 1 | -0.7 | 7.09  | 2.69  | 6.28  | 10.88 | 6.68  | 8.59  |  |
| 502 | 8.66  | 1 | 1.1  | 7.28  | 16.44 |       |       |       |       |  |
| 503 | 7.40  | 1 | 0.2  | 7.17  | 14.42 |       |       |       |       |  |
| 504 | 6.51  | 2 | 0.6  | 14.10 | 2.04  |       |       |       |       |  |
| 505 | 7.92  | 1 | -0.9 | 6.05  | 16.25 |       |       |       |       |  |
| 506 | 8.40  | 1 | 2.2  | 9.32  | 12.46 | 7.47  | 6.40  | 8.40  | 15.55 |  |
| 507 | 7.39  | 1 | -0.2 | 10.24 | 1.60  |       |       |       |       |  |
| 508 | 8.00  | 2 | 0.6  | 7.91  | 4.34  | 7.29  | 8.85  | 7.60  | 5.77  |  |
| 509 | 9.33  | 1 | 1.2  | 7.44  | 15.88 | 6.10  | 14.18 | 6.77  | 14.05 |  |
| 510 | 8.54  | 1 | 0.9  | 5.02  | 5.72  | 4.55  | 9.73  | 4.79  | 7.02  |  |
| 511 | 9.79  | 1 | -0.4 | 5.77  | 2.10  | 5.22  | 1.93  | 5.50  | 7.13  |  |
| 512 | 10.35 | 1 | 1.6  | 11.12 | 10.00 | 9.72  | 12.46 | 10.42 | 9.47  |  |
| 513 | 8.44  | 2 | 0.7  | 7.46  | 0.99  | 6.74  | 3.03  | 7.10  | 7.12  |  |
| 514 | 7.30  | 1 | 0.7  | 9.43  | 1.57  | 7.96  | 9.66  | 8.70  | 11.92 |  |
| 515 | 6.75  | 2 | 1.1  | 16.35 | 13.99 | 13.57 | 4.21  | 14.96 | 13.14 |  |
| 516 | 6.00  | 1 | -1.1 | 12.67 | 0.04  | 10.52 | 4.68  | 11.60 | 13.16 |  |
| 517 | 7.57  | 1 | 1.9  | 5.72  | 13.15 | 4.98  | 9.31  | 5.35  | 9.72  |  |
| 518 | 9.48  | 2 | 0.4  | 4.51  | 8.99  | 4.16  | 13.48 | 4.33  | 5.70  |  |
| 519 | 7.53  | 2 | -0.9 | 7.23  | 0.62  | 6.02  | 5.27  | 6.62  | 13.00 |  |
| 520 | 10.00 | 1 | 1.7  | 13.94 | 0.73  | 11.68 | 5.40  | 12.81 | 12.45 |  |
| 521 | 10.35 | 2 | -0.5 | 8.54  | 13.44 |       |       |       |       |  |
| 522 | 6.38  | 1 | 0.9  | 8.97  | 10.85 | 7.54  | 0.37  | 8.26  | 12.29 |  |
| 523 | 9.56  | 2 | -0.7 | 6.51  | 1.99  | 6.00  | 6.50  | 6.25  | 5.81  |  |
| 524 | 8.10  | 1 | 1.0  | 3.54  | 15.29 | 2.99  | 14.93 | 3.26  | 12.00 |  |
| 525 | 8.67  | 2 | 0.5  | 17.37 | 16.21 | 14.42 | 11.93 | 15.89 | 13.12 |  |
| 526 | 8.68  | 2 | 0.6  | 7.18  | 4.08  | 6.28  | 11.62 | 6.73  | 9.45  |  |
| 527 | 9.90  | 1 | 0.5  | 7.37  | 14.74 |       |       |       |       |  |



|     |       |   |      |       |       |       |       |       |       |
|-----|-------|---|------|-------|-------|-------|-------|-------|-------|
| 528 | 8.36  | 2 | 1.0  | 21.78 | 8.73  |       |       |       |       |
| 529 | 10.25 | 1 | -0.8 | 10.14 | 13.66 |       |       |       |       |
| 530 | 7.76  | 2 | 2.4  | 8.57  | 2.38  |       |       |       |       |
| 531 | 9.58  | 1 | 0.7  | 5.63  | 7.07  |       |       |       |       |
| 532 | 7.27  | 1 | 0.2  | 7.93  | 14.92 |       |       |       |       |
| 533 | 9.35  | 1 | -1.1 | 17.92 | 0.16  | 14.66 | 2.90  | 16.29 | 14.16 |
| 534 | 9.07  | 2 | 0.5  | 17.85 | 4.78  |       |       |       |       |
| 535 | 9.69  | 2 | 0.2  | 11.24 | 16.33 |       |       |       |       |
| 536 | 7.62  | 2 | 1.3  | 11.70 | 9.75  |       |       |       |       |
| 537 | 7.40  | 1 | 0.8  | 3.78  | 4.34  | 3.48  | 0.18  | 3.63  | 5.91  |
| 538 | 7.03  | 2 | 1.5  | 7.98  | 9.72  | 7.36  | 14.20 | 7.67  | 5.69  |
| 539 | 10.52 | 2 | -0.6 | 4.60  | 15.28 |       |       |       |       |
| 540 | 7.77  | 1 | 1.8  | 7.40  | 1.72  | 6.72  | 16.12 | 7.06  | 6.78  |
| 541 | 8.07  | 1 | 0.8  | 6.45  | 4.16  | 5.50  | 1.73  | 5.97  | 11.28 |
| 542 | 8.08  | 1 | -1.0 | 5.71  | 15.56 | 4.74  | 5.79  | 5.22  | 13.20 |
| 543 | 6.21  | 1 | 0.8  | 6.75  | 3.33  | 5.61  | 7.94  | 6.18  | 13.15 |
| 544 | 9.16  | 1 | 0.4  | 8.26  | 1.39  | 7.22  | 8.95  | 7.74  | 9.52  |
| 545 | 9.06  | 2 | 0.9  | 12.76 | 1.40  | 10.66 | 8.42  | 11.71 | 12.71 |
| 546 | 9.42  | 2 | 1.8  | 5.25  | 1.79  | 4.40  | 7.89  | 4.82  | 12.40 |
| 547 | 10.28 | 2 | 0.2  | 5.00  | 4.72  | 4.01  | 10.59 | 4.51  | 15.49 |
| 548 | 9.96  | 2 | -1.4 | 6.76  | 15.34 | 5.82  | 0.95  | 6.29  | 10.57 |
| 549 | 9.02  | 2 | 1.3  | 4.35  | 16.21 |       |       |       |       |
| 550 | 8.94  | 2 | 1.7  | 10.15 | 0.06  | 8.48  | 9.87  | 9.31  | 12.66 |
| 551 | 9.70  | 1 | 1.3  | 5.10  | 9.08  |       |       |       |       |
| 552 | 8.11  | 1 | 0.5  | 3.57  | 8.33  | 3.23  | 12.33 | 3.40  | 6.99  |
| 553 | 8.58  | 2 | 1.6  | 6.97  | 7.72  | 5.83  | 1.42  | 6.40  | 12.51 |
| 554 | 9.23  | 1 | -0.3 | 11.47 | 9.63  |       |       |       |       |
| 555 | 6.18  | 2 | 2.1  | 3.97  | 8.57  | 3.48  | 13.89 | 3.73  | 9.35  |
| 556 | 10.13 | 1 | 1.1  | 8.62  | 3.43  | 7.94  | 7.94  | 8.28  | 5.79  |
| 557 | 8.07  | 1 | 1.6  | 10.33 | 5.90  | 9.00  | 1.66  | 9.67  | 9.71  |
| 558 | 6.65  | 2 | 1.4  | 4.11  | 12.87 | 3.45  | 1.67  | 3.78  | 12.37 |
| 559 | 8.79  | 2 | -1.9 | 16.61 | 16.00 |       |       |       |       |
| 560 | 9.66  | 2 | 1.2  | 6.07  | 14.53 | 5.04  | 4.75  | 5.55  | 13.16 |

|     |       |   |      |       |       |       |       |       |       |
|-----|-------|---|------|-------|-------|-------|-------|-------|-------|
| 561 | 7.88  | 2 | 1.9  | 7.88  | 13.46 | 6.85  | 5.93  | 7.37  | 9.91  |
| 562 | 7.88  | 1 | -0.7 | 10.08 | 7.43  | 8.48  | 3.80  | 9.28  | 12.15 |
| 563 | 8.24  | 2 | -0.4 | 11.75 | 9.39  |       |       |       |       |
| 564 | 7.66  | 1 | 1.6  | 10.26 | 2.58  | 8.97  | 10.13 | 9.61  | 9.49  |
| 565 | 8.24  | 1 | -0.9 | 13.07 | 2.60  | 10.64 | 8.48  | 11.86 | 14.51 |
| 566 | 7.83  | 2 | 0.9  | 9.12  | 0.67  | 7.59  | 5.22  | 8.36  | 12.97 |
| 567 | 9.10  | 1 | 1.9  | 7.45  | 6.38  | 6.44  | 15.56 | 6.95  | 10.27 |
| 568 | 7.80  | 2 | 2.0  | 5.64  | 5.97  |       |       |       |       |
| 569 | 7.66  | 1 | 0.4  | 5.77  | 8.66  |       |       |       |       |
| 570 | 6.64  | 1 | 2.3  | 6.64  | 7.89  |       |       |       |       |
| 571 | 9.34  | 1 | 2.2  | 8.89  | 5.61  | 8.05  | 9.62  | 8.47  | 7.02  |
| 572 | 9.80  | 1 | 2.0  | 12.22 | 4.09  |       |       |       |       |
| 573 | 6.34  | 1 | 1.8  | 9.44  | 6.01  | 7.72  | 8.62  | 8.58  | 14.17 |
| 574 | 7.44  | 1 | 0.8  | 8.15  | 7.60  | 6.42  | 13.46 | 7.29  | 16.80 |
| 575 | 7.92  | 1 | -0.6 | 8.74  | 5.55  | 7.14  | 16.58 | 7.94  | 14.22 |
| 576 | 8.53  | 2 | 1.0  | 5.17  | 11.07 | 4.30  | 1.27  | 4.73  | 13.04 |
| 577 | 9.00  | 1 | -0.8 | 14.22 | 0.42  |       |       |       |       |
| 578 | 10.00 | 1 | 0.6  | 8.74  | 12.72 |       |       |       |       |
| 579 | 9.12  | 1 | 1.0  | 12.45 | 6.92  | 11.27 | 10.93 | 11.86 | 7.01  |
| 580 | 11.20 | 2 | -0.7 | 12.28 | 10.68 |       |       |       |       |
| 581 | 8.68  | 2 | 1.1  | 11.80 | 15.11 | 10.60 | 7.31  | 11.20 | 7.62  |
| 582 | 9.72  | 2 | 1.7  | 6.93  | 14.07 |       |       |       |       |
| 583 | 6.68  | 2 | 1.5  | 12.09 | 3.14  | 10.15 | 9.32  | 11.12 | 12.33 |
| 584 | 9.72  | 2 | -1.5 | 14.07 | 12.55 |       |       |       |       |
| 585 | 7.13  | 2 | 1.2  | 6.80  | 3.63  | 5.67  | 6.20  | 6.23  | 12.79 |
| 586 | 8.10  | 1 | 1.4  | 7.35  | 3.47  | 6.41  | 4.09  | 6.88  | 9.65  |
| 587 | 7.09  | 2 | 1.2  | 15.38 | 1.41  |       |       |       |       |
| 588 | 8.15  | 1 | -0.3 | 7.83  | 2.27  |       |       |       |       |
| 589 | 8.28  | 1 | 1.6  | 10.99 | 13.31 | 9.58  | 9.14  | 10.29 | 9.73  |
| 590 | 7.66  | 2 | 0.6  | 9.71  | 14.67 |       |       |       |       |
| 591 | 10.17 | 2 | 0.9  | 10.49 | 10.90 | 9.51  | 14.88 | 10.00 | 6.95  |
| 592 | 10.45 | 2 | -1.4 | 5.22  | 7.11  | 4.82  | 11.61 | 5.02  | 5.73  |
| 593 | 6.66  | 2 | -0.9 | 6.66  | 7.29  | 5.24  | 0.49  | 5.95  | 16.87 |

|     |       |   |      |       |       |       |       |       |       |
|-----|-------|---|------|-------|-------|-------|-------|-------|-------|
| 594 | 7.46  | 2 | 2.5  | 7.64  | 16.17 | 6.15  | 14.50 | 6.89  | 15.36 |
| 595 | 10.75 | 2 | 0.4  | 6.96  | 14.41 | 5.60  | 12.84 | 6.28  | 15.35 |
| 596 | 7.09  | 1 | 0.3  | 7.77  | 6.63  | 6.54  | 4.60  | 7.16  | 12.12 |
| 597 | 7.70  | 2 | -1.1 | 10.87 | 6.87  | 9.15  | 4.36  | 10.01 | 12.13 |
| 598 | 9.07  | 2 | 1.0  | 20.33 | 7.20  | 16.59 | 7.50  | 18.46 | 14.33 |
| 599 | 8.14  | 2 | 1.1  | 10.65 | 5.46  | 8.51  | 11.33 | 9.58  | 15.83 |
| 600 | 8.90  | 1 | -1.0 | 12.05 | 15.34 | 9.68  | 10.54 | 10.86 | 15.44 |
| 601 | 7.19  | 2 | 0.3  | 9.34  | 8.81  | 8.18  | 13.65 | 8.76  | 9.37  |
| 602 | 7.80  | 2 | 0.2  | 5.50  | 14.27 |       |       |       |       |
| 603 | 8.50  | 2 | 1.4  | 5.99  | 15.26 | 5.02  | 4.08  | 5.50  | 12.46 |
| 604 | 9.22  | 2 | 0.4  | 19.14 | 2.10  |       |       |       |       |
| 605 | 6.70  | 2 | -0.7 | 8.39  | 2.97  | 7.10  | 14.16 | 7.74  | 11.74 |
| 606 | 8.24  | 1 | 1.6  | 7.45  | 14.83 |       |       |       |       |
| 607 | 7.63  | 1 | 1.6  | 10.77 | 3.31  |       |       |       |       |
| 608 | 11.00 | 1 | 1.4  | 6.35  | 4.35  | 5.74  | 8.37  | 6.05  | 7.04  |
| 609 | 10.60 | 2 | 2.8  | 10.81 | 1.76  | 9.03  | 8.06  | 9.92  | 12.72 |
| 610 | 8.84  | 2 | -1.2 | 8.29  | 9.94  | 7.21  | 1.81  | 7.75  | 9.86  |
| 611 | 5.95  | 1 | 1.4  | 5.73  | 0.04  | 4.87  | 7.74  | 5.30  | 11.57 |
| 612 | 8.59  | 2 | -0.3 | 6.26  | 13.95 |       |       |       |       |
| 613 | 7.13  | 1 | 0.5  | 10.60 | 1.22  |       |       |       |       |
| 614 | 8.36  | 1 | 0.8  | 7.84  | 14.92 | 6.71  | 16.54 | 7.28  | 11.06 |
| 615 | 8.75  | 1 | 1.7  | 8.65  | 13.10 |       |       |       |       |
| 616 | 9.80  | 1 | -1.0 | 6.15  | 3.54  |       |       |       |       |
| 617 | 9.82  | 1 | -1.6 | 7.42  | 13.61 | 6.40  | 2.48  | 6.91  | 10.44 |
| 618 | 8.96  | 2 | 0.8  | 5.49  | 0.38  | 4.79  | 7.17  | 5.14  | 9.57  |
| 619 | 10.86 | 2 | 0.0  | 9.03  | 11.13 | 7.50  | 1.32  | 8.27  | 13.05 |
| 620 | 8.77  | 2 | 0.3  | 8.70  | 16.03 | 7.21  | 6.27  | 7.95  | 13.22 |
| 621 | 9.61  | 1 | 1.1  | 6.40  | 8.32  | 5.88  | 3.81  | 6.14  | 5.97  |
| 622 | 6.91  | 2 | 0.8  | 24.56 | 13.42 | 20.54 | 4.08  | 22.55 | 12.62 |
| 623 | 7.75  | 2 | 1.3  | 7.50  | 7.63  |       |       |       |       |
| 624 | 8.83  | 1 | 2.0  | 6.39  | 3.82  | 5.59  | 11.36 | 5.99  | 9.45  |
| 625 | 10.75 | 1 | 0.7  | 4.90  | 5.83  | 4.23  | 0.06  | 4.56  | 10.46 |
| 626 | 9.07  | 2 | 0.1  | 12.40 | 14.20 | 10.38 | 6.93  | 11.39 | 12.53 |

|     |       |   |      |       |       |       |       |       |       |
|-----|-------|---|------|-------|-------|-------|-------|-------|-------|
| 627 | 8.84  | 2 | 1.7  | 15.52 | 2.53  | 12.99 | 12.33 | 14.25 | 12.57 |
| 628 | 6.43  | 1 | -0.3 | 5.81  | 7.71  | 5.09  | 14.73 | 5.45  | 9.29  |
| 629 | 10.20 | 2 | 1.3  | 9.43  | 0.62  | 8.52  | 3.40  | 8.97  | 7.11  |
| 630 | 9.62  | 1 | -2.1 | 12.16 | 6.83  | 10.20 | 16.58 | 11.18 | 12.43 |
| 631 | 10.60 | 1 | 0.4  | 5.81  | 8.06  |       |       |       |       |
| 632 | 7.17  | 2 | -0.2 | 8.19  | 6.35  | 6.89  | 4.88  | 7.54  | 12.11 |
| 633 | 8.33  | 1 | 0.2  | 13.22 | 13.95 | 12.10 | 8.10  | 12.66 | 6.27  |
| 634 | 11.27 | 2 | 1.1  | 9.66  | 5.65  | 8.91  | 10.15 | 9.28  | 5.75  |
| 635 | 10.02 | 1 | -0.3 | 7.09  | 6.45  | 6.52  | 1.94  | 6.81  | 5.94  |
| 636 | 9.50  | 2 | 0.0  | 2.96  | 0.42  | 2.60  | 12.26 | 2.78  | 8.96  |
| 637 | 9.02  | 2 | 1.0  | 10.13 | 1.50  |       |       |       |       |
| 638 | 7.48  | 1 | 1.9  | 11.28 | 6.15  |       |       |       |       |
| 639 | 8.17  | 2 | -1.1 | 8.17  | 12.42 |       |       |       |       |
| 640 | 8.74  | 1 | 1.4  | 18.50 | 2.70  | 15.05 | 8.58  | 16.77 | 14.56 |
| 641 | 9.31  | 2 | 1.9  | 6.51  | 10.94 | 5.66  | 3.39  | 6.08  | 9.85  |
| 642 | 9.17  | 2 | 2.1  | 5.48  | 4.01  | 4.79  | 11.56 | 5.14  | 9.45  |
| 643 | 7.51  | 2 | 0.8  | 6.41  | 16.44 | 5.24  | 1.31  | 5.82  | 14.17 |
| 644 | 7.39  | 2 | 1.4  | 8.61  | 2.83  | 7.94  | 7.34  | 8.28  | 5.80  |
| 645 | 7.98  | 2 | 1.7  | 15.57 | 12.83 |       |       |       |       |
| 646 | 7.07  | 1 | 1.1  | 9.74  | 1.66  | 8.23  | 9.56  | 8.99  | 11.93 |
| 647 | 8.13  | 2 | -1.4 | 6.47  | 1.28  | 5.95  | 3.23  | 6.21  | 5.86  |
| 648 | 8.75  | 1 | 0.5  | 8.74  | 5.57  | 7.68  | 16.85 | 8.21  | 9.12  |
| 649 | 8.18  | 1 | 0.6  | 7.04  | 2.47  | 6.15  | 5.09  | 6.59  | 9.62  |
| 650 | 6.48  | 1 | 1.1  | 7.46  | 6.33  | 5.93  | 12.20 | 6.69  | 16.22 |
| 651 | 7.00  | 2 | 0.7  | 8.61  | 14.87 | 7.14  | 5.09  | 7.88  | 13.18 |
| 652 | 10.05 | 1 | -0.7 | 11.54 | 3.32  | 9.66  | 13.11 | 10.60 | 12.55 |
| 653 | 10.00 | 2 | 2.1  | 8.64  | 8.42  | 7.12  | 11.90 | 7.88  | 13.67 |
| 654 | 6.58  | 1 | 1.5  | 9.52  | 2.64  |       |       |       |       |
| 655 | 7.70  | 1 | 0.8  | 17.94 | 2.54  | 16.50 | 1.98  | 17.22 | 5.88  |
| 656 | 6.71  | 1 | 0.6  | 10.54 | 9.63  | 9.52  | 5.62  | 10.03 | 7.24  |
| 657 | 8.80  | 1 | -1.0 | 11.38 | 4.29  | 9.92  | 3.27  | 10.65 | 9.67  |
| 658 | 6.10  | 1 | -0.8 | 8.48  | 1.78  | 6.84  | 0.96  | 7.66  | 15.13 |
| 659 | 6.23  | 2 | 2.2  | 10.38 | 10.82 | 8.49  | 16.03 | 9.44  | 14.15 |

|     |       |   |      |       |       |       |       |       |       |
|-----|-------|---|------|-------|-------|-------|-------|-------|-------|
| 660 | 8.93  | 1 | 1.8  | 7.34  | 15.52 | 6.21  | 9.43  | 6.77  | 11.83 |
| 661 | 11.27 | 1 | 0.3  | 9.52  | 15.39 |       |       |       |       |
| 662 | 9.55  | 2 | -1.8 | 10.87 | 1.72  | 10.00 | 2.80  | 10.43 | 5.87  |
| 663 | 7.40  | 2 | 1.6  | 6.18  | 2.44  | 5.39  | 5.12  | 5.78  | 9.62  |
| 664 | 10.98 | 1 | 1.5  | 4.50  | 16.64 |       |       |       |       |
| 665 | 10.60 | 2 | 0.5  | 9.61  | 2.02  | 8.73  | 14.83 | 9.17  | 6.75  |
| 666 | 6.90  | 2 | 0.4  | 8.44  | 2.07  | 7.14  | 13.27 | 7.79  | 11.78 |
| 667 | 7.10  | 1 | 2.2  | 6.37  | 13.34 |       |       |       |       |
| 668 | 10.38 | 2 | -0.2 | 6.61  | 13.88 |       |       |       |       |
| 669 | 6.08  | 2 | -1.2 | 6.63  | 16.60 | 5.57  | 5.14  | 6.10  | 12.26 |
| 670 | 7.85  | 1 | 0.2  | 7.64  | 1.93  | 6.67  | 5.63  | 7.15  | 9.61  |
| 671 | 7.96  | 1 | 0.6  | 8.53  | 5.36  | 7.47  | 12.89 | 8.00  | 9.41  |
| 672 | 6.43  | 2 | -1.1 | 7.35  | 4.55  |       |       |       |       |
| 673 | 8.41  | 2 | 0.5  | 8.57  | 0.04  |       |       |       |       |
| 674 | 7.90  | 1 | 1.6  | 6.23  | 1.65  | 5.73  | 2.86  | 5.98  | 5.87  |
| 675 | 9.49  | 2 | 0.6  | 11.38 | 2.34  | 9.57  | 3.55  | 10.48 | 12.17 |
| 676 | 6.40  | 1 | -0.1 | 5.54  | 10.77 | 4.84  | 11.69 | 5.19  | 9.53  |
| 677 | 7.37  | 2 | 0.5  | 18.37 | 6.09  |       |       |       |       |
| 678 | 6.50  | 2 | 0.9  | 6.68  | 16.02 | 5.52  | 13.39 | 6.10  | 13.50 |
| 679 | 10.18 | 1 | 1.3  | 13.83 | 7.99  | 12.76 | 12.48 | 13.30 | 5.71  |
| 680 | 6.50  | 2 | -0.7 | 7.52  | 11.10 | 6.56  | 11.36 | 7.04  | 9.55  |
| 681 | 6.41  | 2 | -0.2 | 8.46  | 12.26 |       |       |       |       |
| 682 | 9.86  | 2 | 0.8  | 7.66  | 6.68  | 6.64  | 3.18  | 7.15  | 10.11 |
| 683 | 7.76  | 2 | -0.3 | 7.61  | 6.77  | 6.03  | 12.64 | 6.82  | 16.42 |
| 684 | 9.12  | 2 | 1.2  | 5.78  | 10.24 | 4.81  | 0.43  | 5.29  | 13.02 |
| 685 | 10.20 | 1 | 0.4  | 7.62  | 4.23  | 7.02  | 8.74  | 7.32  | 5.77  |
| 686 | 8.72  | 2 | 1.2  | 7.35  | 12.83 | 6.17  | 1.62  | 6.76  | 12.37 |
| 687 | 9.20  | 2 | 1.3  | 13.12 | 3.83  | 11.07 | 7.41  | 12.09 | 12.01 |
| 688 | 11.00 | 2 | 1.7  | 21.95 | 1.39  | 18.89 | 7.60  | 20.42 | 10.62 |
| 689 | 8.68  | 2 | 1.6  | 8.64  | 5.85  |       |       |       |       |
| 690 | 6.65  | 2 | 1.2  | 5.31  | 16.19 |       |       |       |       |
| 691 | 9.30  | 1 | 1.3  | 5.49  | 0.54  | 4.59  | 10.35 | 5.04  | 12.64 |
| 692 | 8.40  | 2 | 1.2  | 8.09  | 16.42 |       |       |       |       |

|     |       |   |      |       |       |       |       |       |       |
|-----|-------|---|------|-------|-------|-------|-------|-------|-------|
| 693 | 7.09  | 1 | 2.1  | 5.11  | 16.43 | 4.13  | 13.41 | 4.62  | 14.96 |
| 694 | 6.09  | 1 | 0.3  | 8.00  | 10.98 | 6.34  | 13.04 | 7.17  | 16.34 |
| 695 | 8.25  | 1 | 0.2  | 10.37 | 15.84 |       |       |       |       |
| 696 | 7.26  | 2 | -0.5 | 12.12 | 5.79  |       |       |       |       |
| 697 | 7.83  | 2 | 0.8  | 9.70  | 3.95  | 8.09  | 5.88  | 8.89  | 12.80 |
| 698 | 9.91  | 2 | -0.9 | 6.55  | 10.14 | 6.04  | 14.62 | 6.29  | 5.68  |
| 699 | 8.88  | 2 | 0.6  | 7.35  | 8.86  | 6.39  | 1.30  | 6.87  | 9.79  |
| 700 | 7.22  | 2 | 0.1  | 10.13 | 16.52 |       |       |       |       |
| 701 | 8.56  | 1 | 0.4  | 12.29 | 4.43  | 10.29 | 14.22 | 11.29 | 12.51 |
| 702 | 10.50 | 2 | 0.1  | 7.67  | 4.20  | 7.06  | 8.70  | 7.36  | 5.77  |
| 703 | 5.81  | 1 | 0.8  | 2.78  | 15.34 | 2.29  | 7.59  | 2.54  | 13.71 |
| 704 | 7.28  | 2 | -0.9 | 1.77  | 6.56  | 1.60  | 10.57 | 1.69  | 7.01  |
| 705 | 9.30  | 1 | -0.9 | 11.09 | 7.72  | 9.65  | 0.16  | 10.37 | 9.76  |
| 706 | 7.85  | 2 | -3.1 | 8.63  | 1.80  | 7.54  | 9.36  | 8.09  | 9.51  |
| 707 | 5.69  | 2 | 0.9  | 15.14 | 8.89  | 12.59 | 4.38  | 13.86 | 13.05 |
| 708 | 8.90  | 1 | 0.9  | 5.59  | 9.71  | 4.95  | 3.83  | 5.27  | 8.50  |
| 709 | 6.75  | 2 | 1.0  | 10.44 | 16.82 |       |       |       |       |
| 710 | 9.86  | 2 | 0.0  | 8.92  | 3.35  | 8.21  | 1.17  | 8.57  | 5.90  |
| 711 | 8.20  | 2 | -0.2 | 4.61  | 0.19  | 3.85  | 14.51 | 4.23  | 12.67 |
| 712 | 6.03  | 2 | -1.5 | 5.19  | 6.28  | 4.51  | 5.03  | 4.85  | 9.94  |
| 713 | 9.20  | 2 | 0.6  | 7.29  | 3.23  | 6.72  | 7.74  | 7.01  | 5.79  |
| 714 | 7.39  | 1 | 1.2  | 5.77  | 7.97  | 5.32  | 12.47 | 5.54  | 5.71  |
| 715 | 9.39  | 2 | 1.8  | 9.56  | 16.25 | 7.52  | 7.27  | 8.54  | 16.88 |
| 716 | 8.48  | 2 | 1.7  | 18.41 | 15.84 | 15.87 | 6.27  | 17.14 | 10.48 |
| 717 | 6.23  | 2 | 1.7  | 5.76  | 3.21  | 4.88  | 14.40 | 5.32  | 11.73 |
| 718 | 6.25  | 2 | 2.1  | 8.86  | 16.02 | 7.44  | 16.66 | 8.15  | 12.31 |
| 719 | 10.80 | 1 | -1.0 | 6.80  | 14.25 | 5.47  | 13.20 | 6.13  | 15.37 |
| 720 | 6.83  | 2 | 2.0  | 13.84 | 3.77  | 12.21 | 9.49  | 13.03 | 8.81  |
| 721 | 7.68  | 2 | -0.4 | 8.47  | 0.03  | 7.23  | 8.39  | 7.85  | 11.23 |
| 722 | 8.90  | 1 | -0.1 | 3.61  | 7.21  | 3.15  | 0.35  | 3.38  | 9.75  |
| 723 | 9.11  | 2 | 1.7  | 2.84  | 8.61  | 2.36  | 1.21  | 2.60  | 12.96 |
| 724 | 11.04 | 1 | 0.1  | 8.29  | 7.97  | 7.26  | 2.08  | 7.78  | 9.38  |
| 725 | 8.10  | 1 | 0.5  | 6.55  | 7.86  |       |       |       |       |

|     |       |   |      |       |       |       |       |       |       |
|-----|-------|---|------|-------|-------|-------|-------|-------|-------|
| 726 | 9.10  | 1 | 0.9  | 7.22  | 3.91  | 6.02  | 5.91  | 6.62  | 12.80 |
| 727 | 8.50  | 2 | 0.3  | 4.69  | 2.38  | 3.99  | 1.55  | 4.34  | 11.27 |
| 728 | 10.44 | 2 | -1.4 | 9.75  | 14.91 | 7.99  | 3.04  | 8.87  | 14.03 |
| 729 | 8.59  | 2 | 0.0  | 13.02 | 0.32  | 11.78 | 4.34  | 12.40 | 7.10  |
| 730 | 8.59  | 2 | 0.0  | 7.30  | 2.90  | 6.60  | 6.91  | 6.95  | 7.06  |
| 731 | 8.96  | 1 | -0.7 | 9.28  | 3.62  | 8.12  | 11.16 | 8.70  | 9.46  |
| 732 | 6.34  | 2 | -0.7 | 8.14  | 16.94 | 6.50  | 8.37  | 7.32  | 15.81 |
| 733 | 8.11  | 1 | 1.4  | 10.64 | 15.33 | 9.59  | 11.35 | 10.11 | 7.32  |
| 734 | 7.00  | 2 | 0.8  | 7.26  | 1.24  |       |       |       |       |
| 735 | 8.31  | 2 | 0.6  | 5.39  | 8.38  |       |       |       |       |
| 736 | 10.89 | 1 | 2.7  | 6.67  | 4.01  | 6.14  | 0.51  | 6.40  | 5.91  |
| 737 | 9.56  | 1 | 0.6  | 15.97 | 13.16 | 13.92 | 9.29  | 14.95 | 9.72  |
| 738 | 7.18  | 2 | 0.2  | 10.89 | 16.20 | 9.45  | 6.23  | 10.17 | 9.96  |
| 739 | 8.78  | 1 | 0.3  | 11.52 | 3.04  | 9.61  | 6.78  | 10.56 | 12.77 |
| 740 | 7.27  | 2 | 1.1  | 5.11  | 7.68  |       |       |       |       |
| 741 | 7.32  | 2 | 1.4  | 17.03 | 15.57 | 13.87 | 10.02 | 15.45 | 14.47 |
| 742 | 8.70  | 2 | -1.0 | 8.66  | 7.02  | 7.58  | 14.54 | 8.12  | 9.37  |
| 743 | 7.19  | 2 | 0.1  | 7.99  | 4.64  |       |       |       |       |
| 744 | 7.27  | 2 | 1.6  | 7.02  | 6.55  |       |       |       |       |
